# Supplementary material for: Why is the lawn buzzing?
Source: Biodivers Data J. 2014 Apr 24;(2):e1101. doi: 10.3897/BDJ.2.e1101 (PMC4040422; doi:10.3897/BDJ.2.e1101)
Supplement: Supplementary material 6 — Derived wet summer data from NOAA [file biodiversity_data_journal-2-e1101-s006.xlsx]

## Sheet: Sheet1
Month	Precipitation (cm)	(inches)	Concord	Metro Airport	Sherwood
June			2.92	6.47	2.82
July			4.35	4.65	5.06
August			4.8	3.36	4.85
September			8.08	6.9	7.9
October			3.08	3.87	2.42
